# Supplementary material for: Listening to their voices: understanding rural women’s perceptions of good delivery care at the Mibilizi District Hospital in Rwanda
Source: Springer Nature journal article supplement (doi:10.1186/s12905-018-0530-3), 2018-02-12
Supplement: MOESM1 [file 15459750]

# WOMEN INTERVIEW GUIDE

|                    |                                                                                                                                                                                                                                                                                                                                                                                                                                                                                                                                                                                                                                                                                                                                                                                                                                                                                                                                                                                                                                                                                                                                                                                                                                                                                                                                                                                                                                                                                                                                                                                                                                                                                                                                                                                                                                                                                                                                                                                                                                                                                                                                                                                                                                                                                                                                                                                                                                                                                                                                                                                                                                                                                                                                                                                                                                                                                           |                   |                    |
|--------------------|-------------------------------------------------------------------------------------------------------------------------------------------------------------------------------------------------------------------------------------------------------------------------------------------------------------------------------------------------------------------------------------------------------------------------------------------------------------------------------------------------------------------------------------------------------------------------------------------------------------------------------------------------------------------------------------------------------------------------------------------------------------------------------------------------------------------------------------------------------------------------------------------------------------------------------------------------------------------------------------------------------------------------------------------------------------------------------------------------------------------------------------------------------------------------------------------------------------------------------------------------------------------------------------------------------------------------------------------------------------------------------------------------------------------------------------------------------------------------------------------------------------------------------------------------------------------------------------------------------------------------------------------------------------------------------------------------------------------------------------------------------------------------------------------------------------------------------------------------------------------------------------------------------------------------------------------------------------------------------------------------------------------------------------------------------------------------------------------------------------------------------------------------------------------------------------------------------------------------------------------------------------------------------------------------------------------------------------------------------------------------------------------------------------------------------------------------------------------------------------------------------------------------------------------------------------------------------------------------------------------------------------------------------------------------------------------------------------------------------------------------------------------------------------------------------------------------------------------------------------------------------------------|-------------------|--------------------|
| <b>Interviewer</b> | Name:                                                                                                                                                                                                                                                                                                                                                                                                                                                                                                                                                                                                                                                                                                                                                                                                                                                                                                                                                                                                                                                                                                                                                                                                                                                                                                                                                                                                                                                                                                                                                                                                                                                                                                                                                                                                                                                                                                                                                                                                                                                                                                                                                                                                                                                                                                                                                                                                                                                                                                                                                                                                                                                                                                                                                                                                                                                                                     | Date:             | Location:          |
| <b>Interviewee</b> | Name:                                                                                                                                                                                                                                                                                                                                                                                                                                                                                                                                                                                                                                                                                                                                                                                                                                                                                                                                                                                                                                                                                                                                                                                                                                                                                                                                                                                                                                                                                                                                                                                                                                                                                                                                                                                                                                                                                                                                                                                                                                                                                                                                                                                                                                                                                                                                                                                                                                                                                                                                                                                                                                                                                                                                                                                                                                                                                     | Date of Delivery: | Mode of Delivery:  |
|                    | Age:                                                                                                                                                                                                                                                                                                                                                                                                                                                                                                                                                                                                                                                                                                                                                                                                                                                                                                                                                                                                                                                                                                                                                                                                                                                                                                                                                                                                                                                                                                                                                                                                                                                                                                                                                                                                                                                                                                                                                                                                                                                                                                                                                                                                                                                                                                                                                                                                                                                                                                                                                                                                                                                                                                                                                                                                                                                                                      | Parity:           | Marital status:    |
|                    |                                                                                                                                                                                                                                                                                                                                                                                                                                                                                                                                                                                                                                                                                                                                                                                                                                                                                                                                                                                                                                                                                                                                                                                                                                                                                                                                                                                                                                                                                                                                                                                                                                                                                                                                                                                                                                                                                                                                                                                                                                                                                                                                                                                                                                                                                                                                                                                                                                                                                                                                                                                                                                                                                                                                                                                                                                                                                           | Education:        | Economic activity: |
| <b>Questions</b>   | <ol style="list-style-type: none"> <li>1. Please tell me how the recent delivery of your baby/ babies took place.</li> <li>2. Could you tell me how you went to hospital for delivery?<br/> Probes: <ul style="list-style-type: none"> <li>- Distance from home to health facility</li> <li>- Transportation from home to facility</li> <li>- Weather and terrain</li> <li>- What costs did you incur in this process?</li> </ul> </li> <li>3. How did you decide to go to the hospital for delivery?<br/> Probes: <ul style="list-style-type: none"> <li>- Who decided that you go to the hospital?</li> <li>- Why wasn't a home delivery an option?</li> </ul> </li> <li>4. What are the services you received at the hospital?<br/> <ul style="list-style-type: none"> <li>- Pre-labor counseling (information)</li> <li>- Ultrasound</li> <li>- Blood tests</li> <li>- Clinical examination</li> <li>- Labor management</li> <li>- Post delivery care</li> <li>- New-born care</li> </ul> </li> <li>5. How did you perceive the services you received?<br/> Probes: <ul style="list-style-type: none"> <li>- Interpersonal behavior of the providers (kind, compassionate)</li> <li>- Perception of negligent care</li> <li>- Promptness of care in case of complication, laboratory results and procedures.</li> <li>- Pain management</li> </ul> </li> <li>6. How long did it take to be attended to after arrival at the hospital?<br/> Probe: <ul style="list-style-type: none"> <li>- What is your opinion on the waiting time?</li> <li>- What was your perception on the reception</li> </ul> </li> <li>7. Did you pay for any service during delivery?<br/> Probes: <ul style="list-style-type: none"> <li>- What did you pay for?</li> <li>- What was the cost?</li> <li>- What was your perception on the cost?</li> <li>- How did it feel not to pay for the services?</li> </ul> </li> <li>8. What sex was your birth attendant?<br/> <ul style="list-style-type: none"> <li>- Were you comfortable with her/him?</li> <li>- Privacy &amp; confidentiality</li> <li>- How much faith/trust did you have in her/him?</li> </ul> </li> <li>9. How often were you examined before delivery?</li> <li>10. Tell me how the contractions felt like.<br/> Probes: <ul style="list-style-type: none"> <li>- What kind of care did you receive during this duration?</li> </ul> </li> <li>11. How was the process of expelling the baby "pushing"?<br/> Probes: <ul style="list-style-type: none"> <li>- How long did it take?</li> <li>- Were you assisted?</li> <li>- Perception of midwife's attitude during this period.</li> <li>- Did episiotomy? If yes: Was it painful?</li> </ul> </li> <li>12. How long did it take to deliver your placenta?<br/> Probes: <ul style="list-style-type: none"> <li>- What is your perception on the time duration?</li> </ul> </li> </ol> |                   |                    |

|         |                                                                                                                                                                                                                                                                                                                                                                                                                                                                                                                                                                                                                                                                                                                                                                                                                                                                                                                                                                                                                                                                                                                                                                                                                                                |
|---------|------------------------------------------------------------------------------------------------------------------------------------------------------------------------------------------------------------------------------------------------------------------------------------------------------------------------------------------------------------------------------------------------------------------------------------------------------------------------------------------------------------------------------------------------------------------------------------------------------------------------------------------------------------------------------------------------------------------------------------------------------------------------------------------------------------------------------------------------------------------------------------------------------------------------------------------------------------------------------------------------------------------------------------------------------------------------------------------------------------------------------------------------------------------------------------------------------------------------------------------------|
|         | <p>13. When did you first see your baby?<br/>Probes:</p> <ul style="list-style-type: none"> <li>- Was it close to you?</li> <li>- Did you breastfeed immediately?</li> <li>- When were you told its sex?</li> </ul> <p>14. Did the baby receive any kind of care immediately after delivery?<br/>What kind of care?<br/>Probes:</p> <ul style="list-style-type: none"> <li>- Perception of care</li> <li>- What kind of care?</li> <li>- Baby clothes available immediately/ baby warm?</li> <li>- Umbilical cord was ligated/tied on spot</li> <li>- If no care, how did you feel about it?</li> </ul> <p>15. Deliveries out of the hospital may include some traditional rituals that you might not get in hospital, how important are these rituals to you?</p> <p>16. Tell me about the caregiver's visits during your stay in the post delivery ward?<br/>Probes:</p> <ul style="list-style-type: none"> <li>- How often?</li> <li>- Pain managed</li> <li>- Baby examined</li> <li>- Advice on breastfeeding and personal hygiene</li> </ul> <p>17. Did you receive any information upon discharge?<br/>Probes:</p> <ul style="list-style-type: none"> <li>- What kind of information?</li> <li>- Is the information helpful?</li> </ul> |
| Closing | <p>I thank you for sharing experience with me and giving me your precious time. Are there any questions or further experience you would like to share with me?</p> <p>May I contact you in case I need further information? In case you want to contact me or you have any questions please don't hesitate: Tel....</p> <p>I</p>                                                                                                                                                                                                                                                                                                                                                                                                                                                                                                                                                                                                                                                                                                                                                                                                                                                                                                               |
