# Supplementary material for: Listening to their voices: understanding rural women’s perceptions of good delivery care at the Mibilizi District Hospital in Rwanda
Source: Springer Nature journal article supplement (doi:10.1186/s12905-018-0530-3), 2018-02-12
Supplement: MOESM3 [file 15459750]

# MIDWIFE INTERVIEW GUIDE

|                    |                                                                                                                                                                                                                                                                                                                                                                                                                                                                                                                                                                                                                                                                                                                                                                                                                                                                                                                                                                                                                                                                                                                                                                                                                                                                                                                                                                                                                                                                                                                                                                                                                                                                                                                                                                                                                                                                                                                                                                                                                                                                                                                                                                                                                                                                                                                                                                                                                                                                                                                                                                                                                                                                                                                                                                                                                                                                                                                                                                                                                                                                                                                                                                                                                                                                                                                                                      |       |           |
|--------------------|------------------------------------------------------------------------------------------------------------------------------------------------------------------------------------------------------------------------------------------------------------------------------------------------------------------------------------------------------------------------------------------------------------------------------------------------------------------------------------------------------------------------------------------------------------------------------------------------------------------------------------------------------------------------------------------------------------------------------------------------------------------------------------------------------------------------------------------------------------------------------------------------------------------------------------------------------------------------------------------------------------------------------------------------------------------------------------------------------------------------------------------------------------------------------------------------------------------------------------------------------------------------------------------------------------------------------------------------------------------------------------------------------------------------------------------------------------------------------------------------------------------------------------------------------------------------------------------------------------------------------------------------------------------------------------------------------------------------------------------------------------------------------------------------------------------------------------------------------------------------------------------------------------------------------------------------------------------------------------------------------------------------------------------------------------------------------------------------------------------------------------------------------------------------------------------------------------------------------------------------------------------------------------------------------------------------------------------------------------------------------------------------------------------------------------------------------------------------------------------------------------------------------------------------------------------------------------------------------------------------------------------------------------------------------------------------------------------------------------------------------------------------------------------------------------------------------------------------------------------------------------------------------------------------------------------------------------------------------------------------------------------------------------------------------------------------------------------------------------------------------------------------------------------------------------------------------------------------------------------------------------------------------------------------------------------------------------------------------|-------|-----------|
| <b>Interviewer</b> | Name:                                                                                                                                                                                                                                                                                                                                                                                                                                                                                                                                                                                                                                                                                                                                                                                                                                                                                                                                                                                                                                                                                                                                                                                                                                                                                                                                                                                                                                                                                                                                                                                                                                                                                                                                                                                                                                                                                                                                                                                                                                                                                                                                                                                                                                                                                                                                                                                                                                                                                                                                                                                                                                                                                                                                                                                                                                                                                                                                                                                                                                                                                                                                                                                                                                                                                                                                                | Date: | Location: |
| <b>Interviewee</b> | Name:                                                                                                                                                                                                                                                                                                                                                                                                                                                                                                                                                                                                                                                                                                                                                                                                                                                                                                                                                                                                                                                                                                                                                                                                                                                                                                                                                                                                                                                                                                                                                                                                                                                                                                                                                                                                                                                                                                                                                                                                                                                                                                                                                                                                                                                                                                                                                                                                                                                                                                                                                                                                                                                                                                                                                                                                                                                                                                                                                                                                                                                                                                                                                                                                                                                                                                                                                | Sex   |           |
|                    | Position:                                                                                                                                                                                                                                                                                                                                                                                                                                                                                                                                                                                                                                                                                                                                                                                                                                                                                                                                                                                                                                                                                                                                                                                                                                                                                                                                                                                                                                                                                                                                                                                                                                                                                                                                                                                                                                                                                                                                                                                                                                                                                                                                                                                                                                                                                                                                                                                                                                                                                                                                                                                                                                                                                                                                                                                                                                                                                                                                                                                                                                                                                                                                                                                                                                                                                                                                            |       |           |
| <b>Questions</b>   | <ol style="list-style-type: none"> <li>Please take me through your typical working day.<br/>Probe: <ul style="list-style-type: none"> <li>Hours of duty per midwife per week</li> <li>Number of night shifts per midwife</li> <li>Annual leave respected</li> <li>Average number of deliveries per day</li> <li>Workload: some women are unattended to for this reason</li> <li>How often do you have to monitor a woman during her active phase of labor?</li> <li>How do you manage the third stage of labor here?</li> </ul> </li> <li>As a birth attendant, how do you feel about the services you provide?<br/>Probe: <ul style="list-style-type: none"> <li>Dissatisfaction/satisfaction; when and why it happens</li> </ul> </li> <li>As a birth attendant, what may be the potential obstacles for you to provide good delivery care?<br/>Probes: <ul style="list-style-type: none"> <li>Inadequate essential drugs in case of complications and emergencies</li> <li>insufficient and inappropriate labor and postnatal rooms</li> <li>Inadequate monitoring equipment e.g Foetoscope, Cardiotocogram (CTG)</li> <li>Availability of drugs for pain management</li> <li>Presence of oxygen and neonatal resuscitation equipment</li> <li>Presence of incubators</li> <li>Availability and access to blood transfusions</li> <li>Presence of ambulance and prompt referral system</li> <li>Client personality (easy/ difficult clients)</li> <li>Workmate relation</li> </ul> </li> <li>How accessible is your hospital for the women in your catchment area?<br/>Probes: <ul style="list-style-type: none"> <li>Distance</li> <li>Transportation from home to facility</li> <li>Terrain/ weather</li> </ul> </li> <li>What is your ability to ensure maximum cleanliness, hygiene and respect aseptic procedures?<br/>Probes: <ul style="list-style-type: none"> <li>Constant water flow</li> <li>Enough cleaners</li> <li>How common are post-operation/puerperal infections</li> <li>Adequate disinfecting material</li> </ul> </li> <li>What is your opinion on the cost of services you provide in regard to the socioeconomic status the women?<br/>Probes: <ul style="list-style-type: none"> <li>Cost of services</li> <li>Subsidies</li> <li>Confiscation of mother or property in case of failure to pay</li> </ul> </li> <li>What is your opinion on birth companions?<br/>Probe: <ul style="list-style-type: none"> <li>Are they helpful?</li> <li>Choice of companion</li> <li>Effect of husband's presence</li> </ul> </li> <li>How do you consider and adapt to cultural/traditional practices or beliefs?<br/>Probes: <ul style="list-style-type: none"> <li>Traditional birth rituals : facility adapted</li> <li>Choice of sex of provider</li> </ul> </li> <li>Do women have to wait to be attended to after arrival at hospital?<br/> <ul style="list-style-type: none"> <li>On average how long does she have to wait?</li> </ul> </li> <li>How long does it take before the mother sees her newborn after delivery?<br/> <ul style="list-style-type: none"> <li>When do you proclaim the sex of the baby to her?</li> </ul> </li> <li>What do you consider prime after delivering the baby?<br/> <ul style="list-style-type: none"> <li>Mother/baby</li> <li>Who do you give more attention to?</li> </ul> </li> </ol> |       |           |

|                |                                                                                                                                                                                                                                                                                                                                                                                                                                                                    |
|----------------|--------------------------------------------------------------------------------------------------------------------------------------------------------------------------------------------------------------------------------------------------------------------------------------------------------------------------------------------------------------------------------------------------------------------------------------------------------------------|
|                | <p>12. What does your post delivery care include?</p> <ul style="list-style-type: none"> <li>- How often are post delivery ward rounds done?</li> </ul> <p>13. Any further care that you provide to mother after she delivers?</p> <p>14. Do you provide information to mothers upon discharge?</p> <p>Probes:</p> <ul style="list-style-type: none"> <li>- What information?</li> <li>- Mother and baby care</li> <li>- Postnatal visits/ Immunization</li> </ul> |
| <b>Closing</b> | <p>I thank you for sharing experience with me and giving me your precious time. Are there any questions or further information you would like to share with me?</p> <p>May I contact you in case I need further information? In case you want to contact me please don't hesitate: Tel...</p>                                                                                                                                                                      |
